# Supplementary material for: VOLCANO 3 – A Miniaturized Chemiluminescence Ozone Monitor for Drone-Based Measurements in Volcanic Plumes
Source: Copernicus journal article supplement (doi:10.5194/egusphere-2025-3976), 2025-08-21
Supplement: Supplementary file 1 [file egusphere-2025-3976-supplement.pdf]

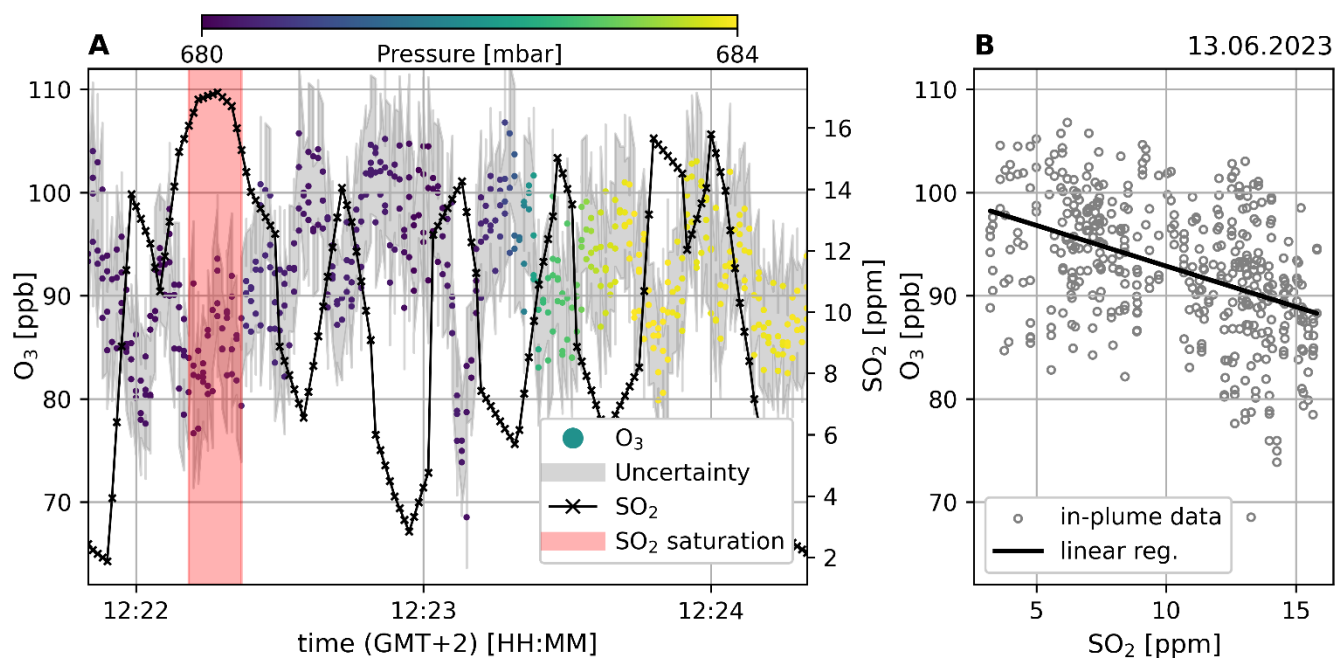

**Figure S 1: Plume measurement from 13.06.2023 measuring the BN plume (see Figure 5 black line). Panel A shows the timeseries from the CL instrument and a co-deployed SO<sub>2</sub> sensor. The color-coding indicates ambient pressure during sampling and the gray shaded area marks the uncertainty of the CL O<sub>3</sub> measurement. The red shaded area marks periods where the SO<sub>2</sub> sensor was in saturation. Panel B shows a correlation plot between O<sub>3</sub> and SO<sub>2</sub> for in-plume data points. In-plume datapoints are defined according to the SO<sub>2</sub> mixing ratio for values larger than 1.5 ppm and smaller than the saturation value of 16 ppm. The correlation has a Pearson correlation coefficient of -0.49 and an R<sup>2</sup> of 0.24.**

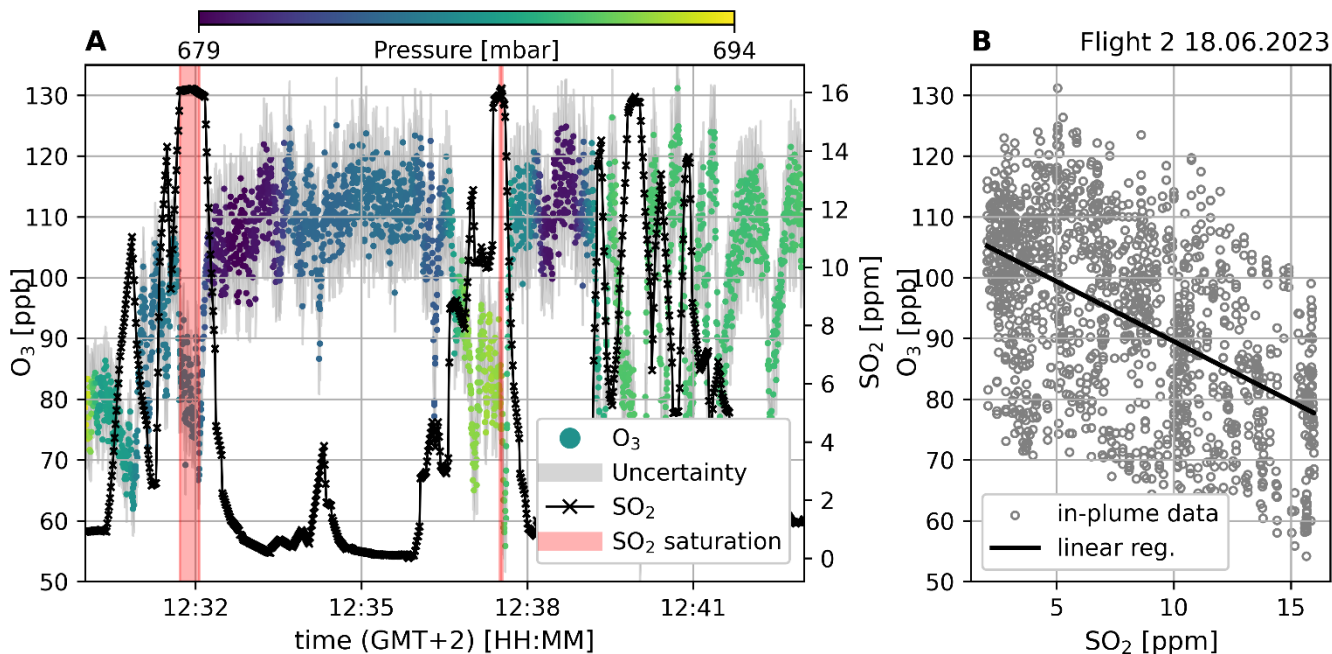

**Figure S 2: Plume measurement from 18.06.2023 (flight 2) measuring the SEC and the BN plume (see Figure 5 black line). Panel A shows the timeseries from the CL instrument and a co-deployed SO<sub>2</sub> sensor. The color-coding indicates ambient pressure during sampling and the gray shaded area marks the uncertainty of the CL O<sub>3</sub> measurement. The red shaded area marks periods where the SO<sub>2</sub> sensor was in saturation. Panel B shows a correlation plot between O<sub>3</sub> and SO<sub>2</sub> for in-plume data points. In-plume datapoints are defined according to the SO<sub>2</sub> mixing ratio for values larger than 1.5 ppm and smaller than the saturation value of 16 ppm. The correlation has a Pearson correlation coefficient of -0.54 and an R<sup>2</sup> of 0.29.**

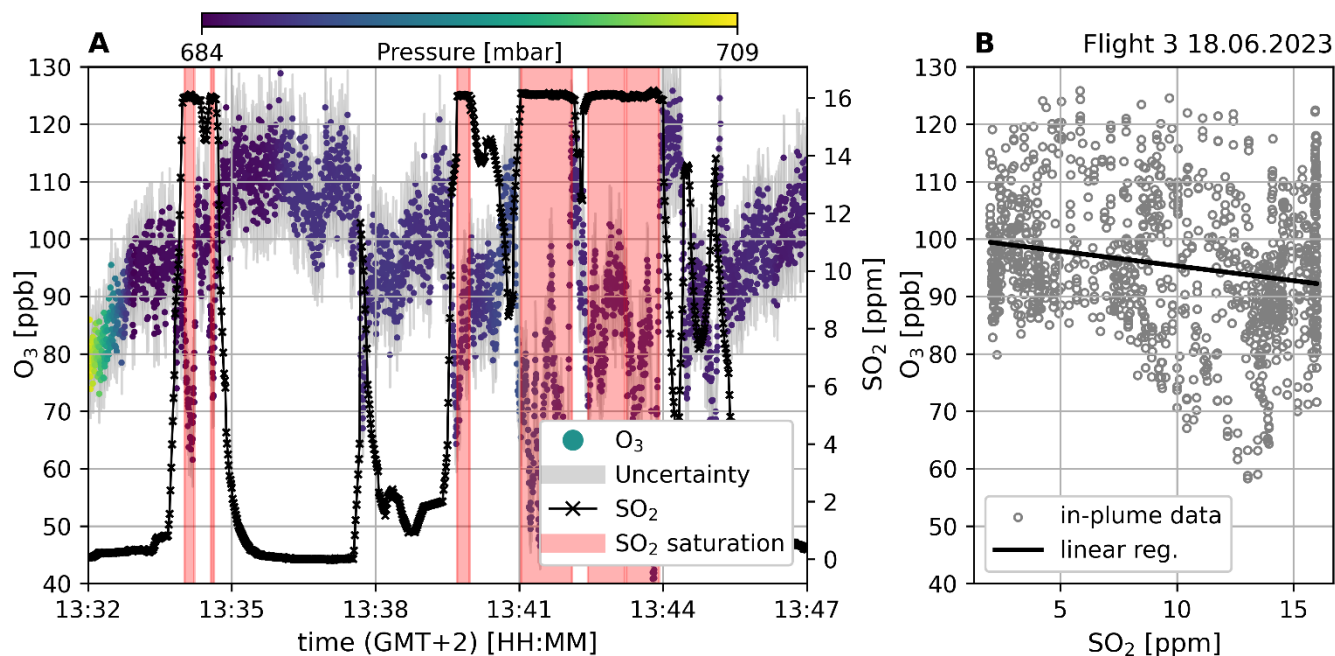

**Figure S 3: Plume measurement from 18.06.2023 (flight 3) measuring the SEC plume (see Figure 5 black line). Panel A shows the time series from the CL instrument and a co-deployed SO<sub>2</sub> sensor. The colour-coding indicates ambient pressure during sampling and the gray shaded area marks the uncertainty of the CL O<sub>3</sub> measurement. The red shaded area marks periods where the SO<sub>2</sub> sensor was in saturation. Panel B shows a correlation plot between O<sub>3</sub> and SO<sub>2</sub> for in-plume data points. In-plume data points are defined according to the SO<sub>2</sub> mixing ratio for values larger than 1.5 ppm and smaller than the saturation value of 16 ppm. The correlation has a Pearson correlation coefficient of -0.54 and an R<sup>2</sup> of 0.29.**

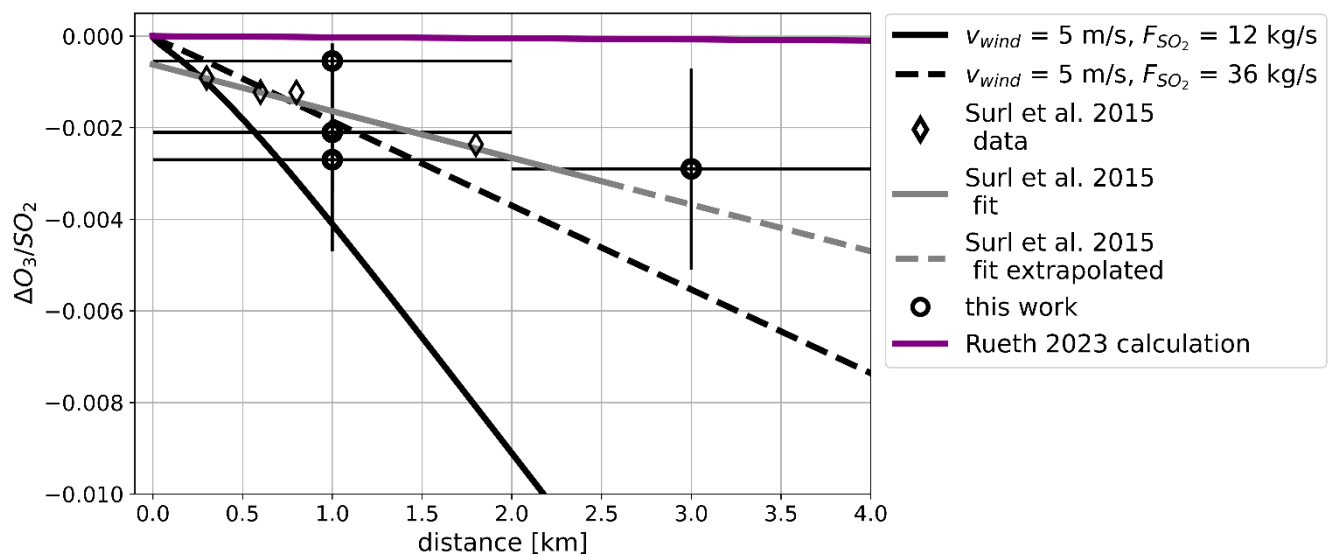

30 **Figure S 4: Comparison of modelled O<sub>3</sub> destruction (Nies et al. 2025) and measurements from Surl et al 2015 (UV O<sub>3</sub> monitor) and this work (CL VOLCANO3, see table 1) in the Mt Etna plume. The x-axis shows the ratio between  $\Delta O_3$  ( $O_{3,in-plume} - O_{3,background}$ ) to SO<sub>2</sub>, which is used as a plume tracer. The dashed model run shows fair agreement between both measurements. Furthermore, measurement data and model are compared to the simplified calculation from Rueth 2023, which appears to underestimate the O<sub>3</sub> destruction.**

35
